# Supplementary material for: Antibodies against low-density lipoprotein receptor–related protein 4 induce myasthenia gravis
Source: JCI journal article supplement (doi:10.1172/jci66039), 2013-11-07

### Supplemental figure legends

Suppl Figure 1. Expression and purification of ecto-LRP4. (A) Schematic diagrams of full length LRP4 and ecto-LRP4. (B) Silver staining of wash-through and purified ecto-LRP4.

Suppl Figure 2. LRP4 sera did not recognize AChR $\alpha$  protein. Lysates of HEK293 cells expressing AChR $\alpha$  were subjected to western blot by anti-AChR antibody mAb35 and by anti-LRP4 sera.

Suppl Figure 3. No effect of motor neuron-specific LRP4 mutation on muscle weakness induced by LRP4 immunization. (A, B) Similar reduction in body weight and muscle strength between LRP4-injected *HB9-LRP4<sup>+/+</sup>* mice (control) and *HB9-LRP4<sup>-/-</sup>* mice. (C, D) Reduced CMAP amplitudes at 20 Hz (C) or at 40 Hz (D) in LRP4-injected *HB9-LRP4<sup>+/+</sup>* mice (control) and *HB9-LRP4<sup>-/-</sup>* mice. (E) Reduced CMAP amplitudes of the 10<sup>th</sup> stimulation at different stimulation frequencies. (F) Representative mEPP traces. Traces on the right were enlarged from those underlined on the left. (G, H) Similar reduction of mEPP amplitude and frequency in the two genotypes after LRP4 immunization. Control, n = 3; *HB9-LRP4<sup>-/-</sup>* mice, n = 5; LRP4-injected control mice, n = 5; LRP4-injected *HB9-LRP4<sup>-/-</sup>* mice, n = 5. 3-4 muscle fibers were recorded from each mouse.

Suppl Figure 4. Immunization of rabbits with ecto-LRP4. (A) Detection of anti-LRP4 antibodies in sera of ecto-LRP4-injected rabbits. Sera were collected one week after first boost and subjected to ELISA. n = 3. (B) Images of representative control and LRP4-injected rabbits. (C) Reduced body weight of LRP4-injected rabbits.

Suppl Figure 5. IgG purification from LRP4-injected rabbit sera. (A) Schematic diagram of IgG purification procedures. (B, C) Analysis of purified rabbit IgGs on 8% non-denaturing PAGE (B) and 12% denaturing SDS-PAGE (C). Fractions surrounding 25<sup>th</sup> fraction were pooled for injection.

A

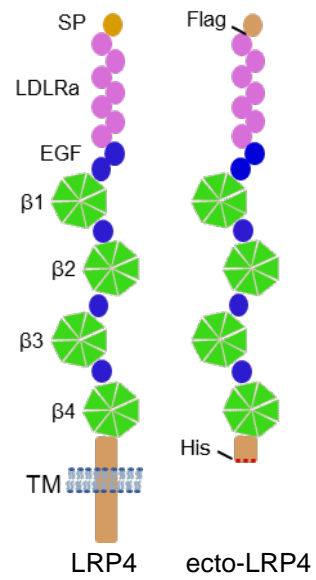

B

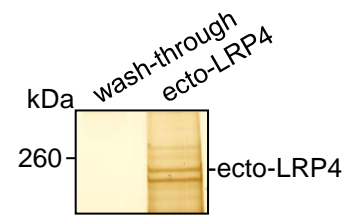

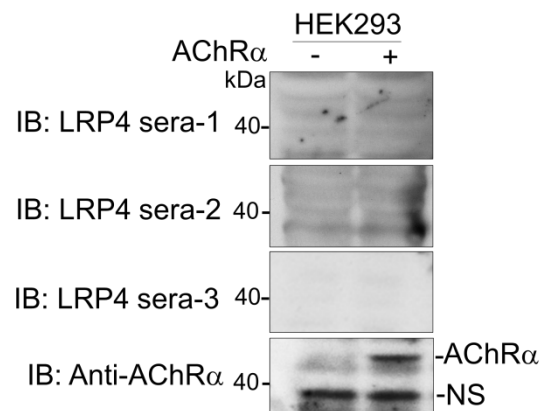

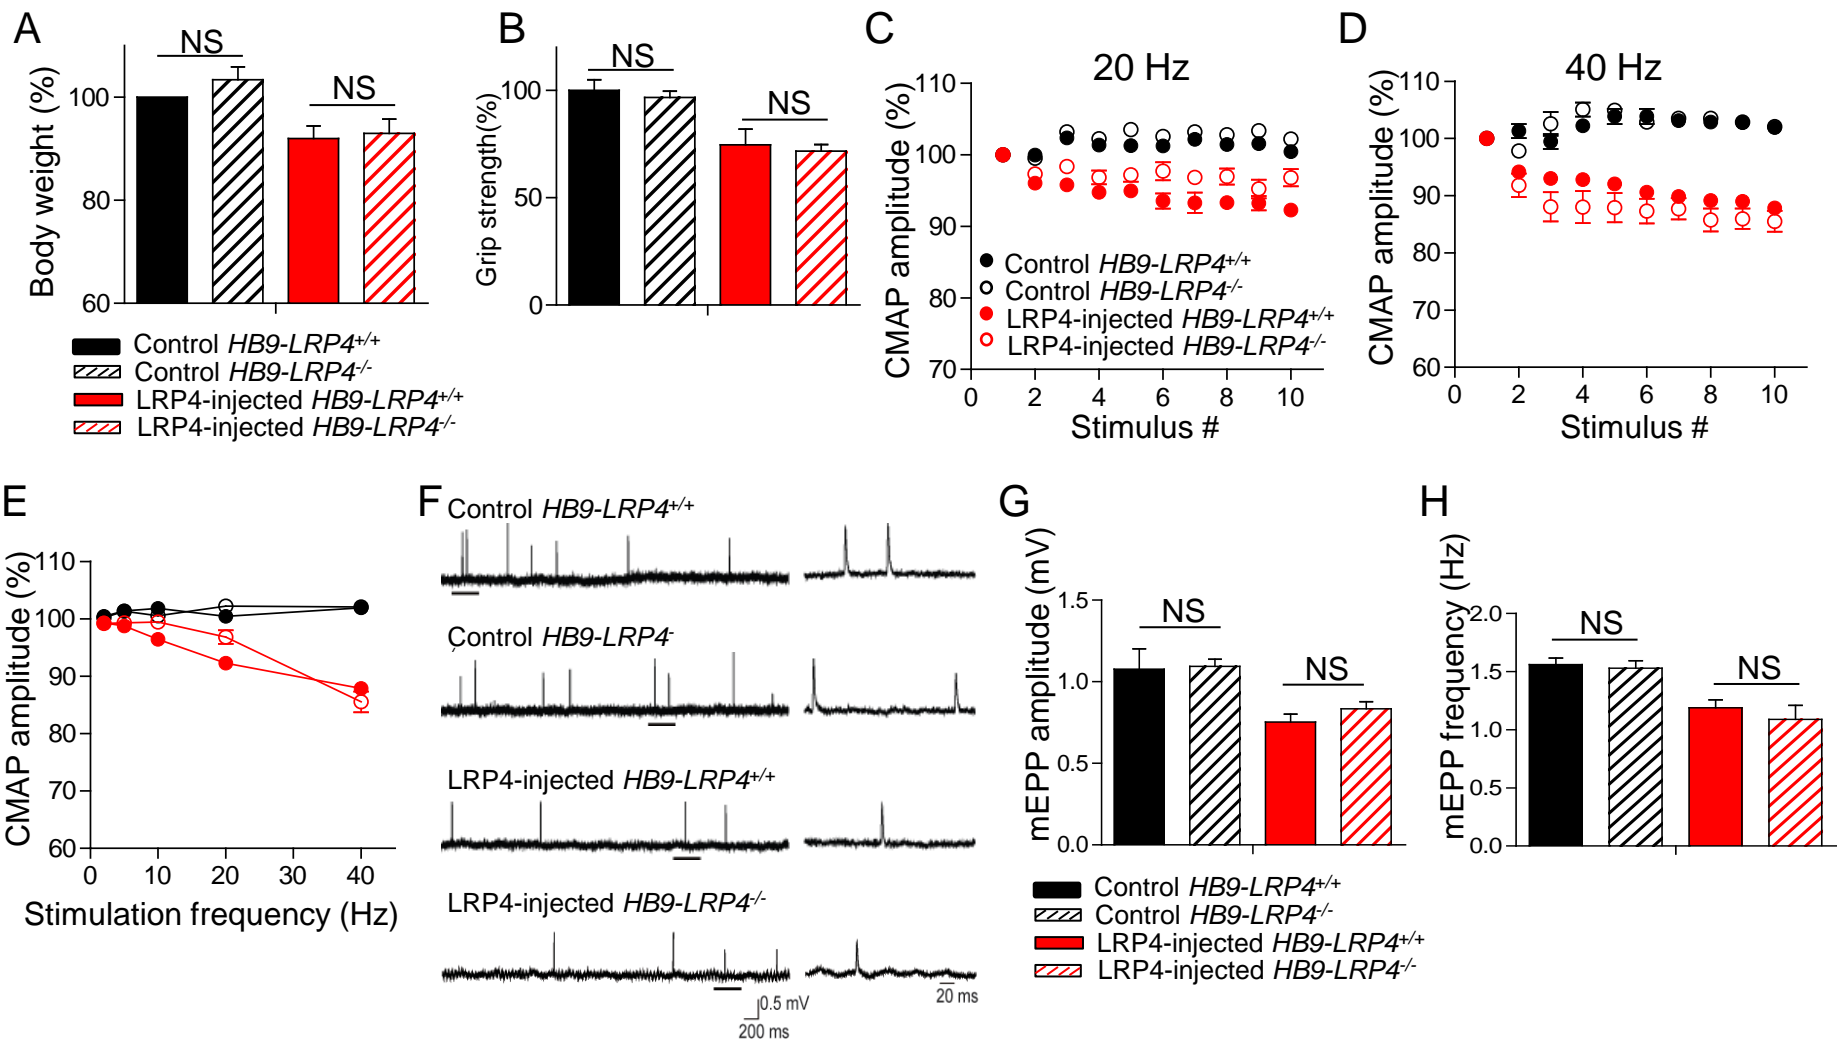

A

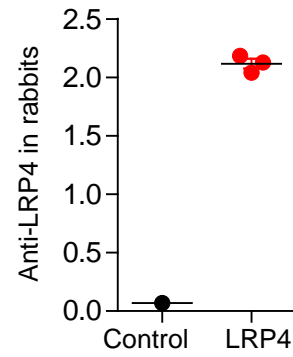

C

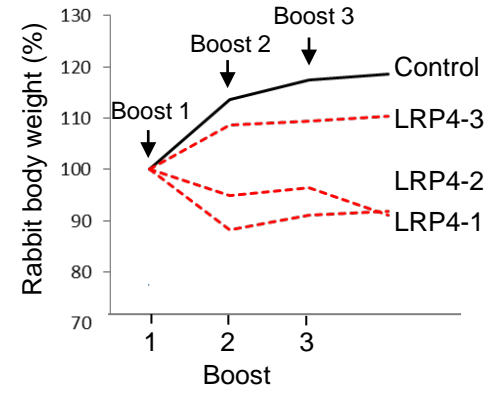

B

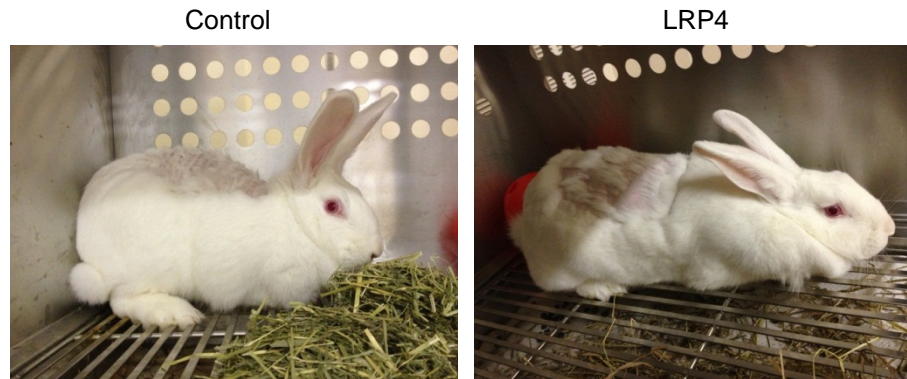

A

### Size Exclusion Chromatography

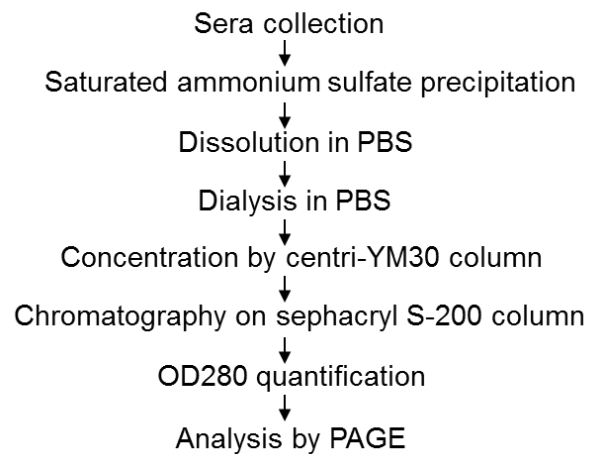

B

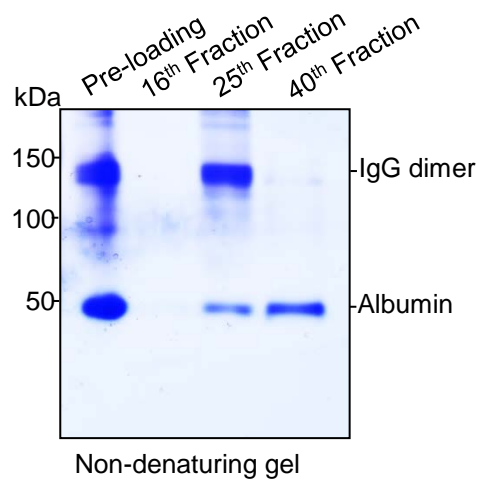

C

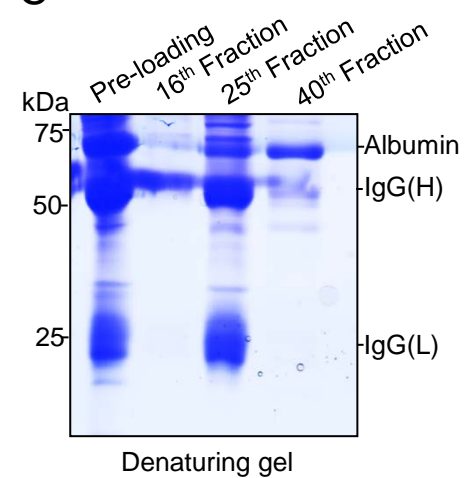

Supplement: sd1 [file 1]
